# Supplementary material for: Identifying and assessing expertise gaps in healthcare education across Europe: a cross-sectional study
Source: Research Square preprint supplement (doi:10.21203/rs.3.rs-7934532/v1), 2025-12-22
Supplement: Supplementary file 1 [file 2953e5b892f6038cc0bcaa79.docx]

**Supplementary file 5. Expertise gaps in terms of TEACHING METHODS** **across the Professional Groups and European Regions**

**Legend:** D2.1. academic levels of gap in Secondary Level (EQF4); D2.2. academic levels of gap in Post Secondary Level (EQF5); D2.3. academic levels of gap in Bachelor’s Degree (EQF6); D2.4. academic levels of gap in Master’s Degree (EQF7); D2.5. academic levels of gap in PhD/Doctorate (EQF8); D3. TEACHING METHODS gap in terms of HARD SKILLS; D4. TEACHING METHODS gap in terms of TRANSVERSAL SKILLS; D5. TEACHING METHODS gap in terms of DIGITAL SKILLS; D6. TEACHING METHODS gap in terms of GREEN SKILLS

| **Geographical area** | | **Profession** | | **D1** | | **D2.1** | | **D2.2** | | **D2.3** | | **D2.4** | | **D2.5** | | **D3** | | **D4** | | **D5** | | **D6** | | |
| --- | --- | --- | --- | --- | --- | --- | --- | --- | --- | --- | --- | --- | --- | --- | --- | --- | --- | --- | --- | --- | --- | --- | --- | --- |
|  | |  | | **MEAN**  **(SD)** | | **MEAN**  **(SD)** | | **MEAN**  **(SD)** | | **MEAN**  **(SD)** | | **MEAN**  **(SD)** | | **MEAN**  **(SD)** | | **MEAN**  **(SD)** | | **MEAN**  **(SD)** | | **MEAN**  **(SD)** | | **MEAN**  **(SD)** | | |
|  |  |  |  |  | **5.00** |  | **5.65** |  | **5.43** |  | **4.79** |  | **4.68** |  | **4.36** |  | **4.86** |  | **4.90** |  | **5.33** |  | **6.05** |  | |
|  |  |  |  |  | **(2.24)** |  | **(2.94)** |  | **(2.67)** |  | **(2.34)** |  | **(2.47)** |  | **(2.67)** |  | **(2.37)** |  | **(2.19)** |  | **(2.27)** |  | **(2.40)** |  | |
|  | **Eastern Europe** |  |  |  | **5.17** |  | **3.60** |  | **4.60** |  | **5.20** |  | **6.00** |  | **7.00** |  | **4.00** |  | **5.17** |  | **5.50** |  | **7.00** |  | |
|  |  |  |  |  | **(2.14)** |  | **(2.07)** |  | **(2.30)** |  | **(2.39)** |  | **(1.87)** |  | **(2.92)** |  | **(2.76)** |  | **(2.32)** |  | **(2.81)** |  | **(2.53)** |  | |
|  |  |  | Medical doctors |  | 4.50 |  | 1.50 |  | 2.50 |  | 3.50 |  | 4.00 |  | 4.00 |  | 1.50 |  | 4.00 |  | 6.00 |  | 7.00 |  | |
|  |  |  |  |  | (3.54) |  | (0.71) |  | (0.71) |  | (0.71) |  | (0.00) |  | (1.41) |  | (0.71) |  | (2.83) |  | (4.24) |  | (4.24) |  | |
|  |  |  | Nurses |  | - |  | - |  | - |  | - |  | - |  | - |  | - |  | - |  | - |  | - |  | |
|  |  |  |  |  | - |  | - |  | - |  | - |  | - |  | - |  | - |  | - |  | - |  | - |  | |
|  |  |  | Allied health professionals |  | 4.50 |  | 5.00 |  | 5.00 |  | 4.00 |  | 7.00 |  | 9.00 |  | 3.50 |  | 4.00 |  | 3.50 |  | 5.50 |  | |
|  |  |  |  |  | (0.71) |  | - |  | - |  | - |  | - |  | - |  | (2.12) |  | (1.41) |  | (0.71) |  | (0.71) |  | |
|  |  |  | Other |  | 8.00 |  | 6.00 |  | 8.00 |  | 9.00 |  | 8.00 |  | 10.0 |  | 8.00 |  | 8.00 |  | 9.00 |  | 10.0 |  | |
|  |  |  |  |  | - |  | - |  | - |  | - |  | - |  | - |  | - |  | - |  | - |  | - |  | |
|  |  |  | Academic |  | 5.00 |  | 4.00 |  | 5.00 |  | 6.00 |  | 7.00 |  | 8.00 |  | 6.00 |  | 7.00 |  | 5.00 |  | 7.00 |  | |
|  |  |  |  |  | - |  | - |  | - |  | - |  | - |  | - |  | - |  | - |  | - |  | - |  | |
|  | **Northern Europe** |  |  |  | **4.37** |  | **4.15** |  | **4.30** |  | **4.03** |  | **3.87** |  | **4.17** |  | **4.21** |  | **4.29** |  | **4.44** |  | **5.71** |  | |
|  |  |  |  |  | **(2.07)** |  | **(3.01)** |  | **(2.51)** |  | **(2.26)** |  | **(2.39)** |  | **(2.59)** |  | **(2.26)** |  | **(2.11)** |  | **(2.12)** |  | **(2.43)** |  | |
|  |  |  | Medical doctors |  | 4.00 |  | 6.50 |  | 6.00 |  | 3.80 |  | 3.50 |  | 3.75 |  | 3.00 |  | 3.00 |  | 3.75 |  | 5.00 |  | |
|  |  |  |  |  | (2.35) |  | (4.04) |  | (3.56) |  | (1.92) |  | (3.11) |  | (3.59) |  | (0.00) |  | (0.82) |  | (2.22) |  | (3.37) |  | |
|  |  |  | Nurses |  | 4.57 |  | 4.00 |  | 4.80 |  | 4.80 |  | 4.40 |  | 4.40 |  | 5.38 |  | 5.13 |  | 5.38 |  | 5.80 |  | |
|  |  |  |  |  | (1.99) |  | (2.00) |  | (2.77) |  | (2.68) |  | (2.41) |  | (1.82) |  | (2.07) |  | (2.53) |  | (2.56) |  | (3.27) |  | |
|  |  |  | Allied health professionals |  | 4.21 |  | 3.20 |  | 3.47 |  | 3.61 |  | 3.56 |  | 4.12 |  | 3.71 |  | 3.94 |  | 4.00 |  | 5.73 |  | |
|  |  |  |  |  | (2.10) |  | (2.43) |  | (1.68) |  | (2.15) |  | (2.25) |  | (2.80) |  | (2.31) |  | (1.86) |  | (1.71) |  | (1.91) |  | |
|  |  |  | Other |  | 6.00 |  | 10.0 |  | 8.00 |  | 6.50 |  | 6.00 |  | 4.00 |  | 5.50 |  | 6.00 |  | 5.50 |  | 7.50 |  | |
|  |  |  |  |  | (1.41) |  | - |  | - |  | (0.71) |  | (1.41) |  | - |  | (2.12) |  | (1.41) |  | (2.12) |  | (2.12) |  | |
|  |  |  | Academic |  | 4.50 |  | 4.00 |  | 4.00 |  | 4.00 |  | 4.00 |  | 5.00 |  | 5.00 |  | 5.00 |  | 5.00 |  | 5.00 |  | |
|  |  |  |  |  | (3.54) |  | (4.24) |  | (4.24) |  | (4.24) |  | (4.24) |  | (2.83) |  | (4.24) |  | (4.24) |  | (4.24) |  | (4.24) |  | |
|  | **Southern Europe** |  |  |  | **5.15** |  | **6.10** |  | **5.70** |  | **4.87** |  | **4.77** |  | **4.20** |  | **5.07** |  | **5.07** |  | **5.38** |  | **6.14** |  | |
|  |  |  |  |  | **(2.17)** |  | **(2.78)** |  | **(2.58)** |  | **(2.27)** |  | **(2.48)** |  | **(2.60)** |  | **(2.21)** |  | **(2.06)** |  | **(2.18)** |  | **(2.34)** |  | |
|  |  |  | Medical doctors |  | 4.78 |  | 4.76 |  | 4.24 |  | 4.57 |  | 4.00 |  | 3.65 |  | 4.61 |  | 4.96 |  | 5.35 |  | 5.70 |  | |
|  |  |  |  |  | (1.93) |  | (2.57) |  | (2.21) |  | (2.46) |  | (2.35) |  | (2.52) |  | (2.04) |  | (1.99) |  | (2.33) |  | (2.67) |  | |
|  |  |  | Nurses |  | 5.24 |  | 6.23 |  | 5.62 |  | 5.20 |  | 4.80 |  | 3.33 |  | 4.71 |  | 5.18 |  | 5.41 |  | 6.06 |  | |
|  |  |  |  |  | (2.41) |  | (3.09) |  | (2.84) |  | (2.60) |  | (2.68) |  | (2.47) |  | (2.42) |  | (2.38) |  | (2.24) |  | (2.51) |  | |
|  |  |  | Allied health professionals |  | 5.10 |  | 6.31 |  | 5.93 |  | 4.77 |  | 4.97 |  | 4.49 |  | 5.10 |  | 5.02 |  | 5.34 |  | 6.19 |  | |
|  |  |  |  |  | (2.24) |  | (2.77) |  | (2.54) |  | (2.29) |  | (2.55) |  | (2.68) |  | (2.25) |  | (2.10) |  | (2.25) |  | (2.30) |  | |
|  |  |  | Other |  | 5.56 |  | 7.38 |  | 7.13 |  | 5.33 |  | 4.88 |  | 4.13 |  | 6.22 |  | 4.67 |  | 5.11 |  | 6.11 |  | |
|  |  |  |  |  | (1.33) |  | (2.07) |  | (2.36) |  | (1.58) |  | (2.17) |  | (2.53) |  | (2.05) |  | (1.58) |  | (1.76) |  | (2.20) |  | |
|  |  |  | Academic |  | 6.33 |  | 6.50 |  | 6.50 |  | 5.50 |  | 4.83 |  | 5.00 |  | 5.67 |  | 6.33 |  | 6.33 |  | 7.33 |  | |
|  |  |  |  |  | (2.50) |  | (3.02) |  | (2.43) |  | (1.64) |  | (2.04) |  | (2.28) |  | (1.75) |  | (1.37) |  | (1.03) |  | (1.03) |  | |
|  | **Western Europe** |  |  |  | **4.85** |  | **5.79** |  | **5.62** |  | **5.04** |  | **4.61** |  | **4.24** |  | **4.46** |  | **4.72** |  | **6.22** |  | **6.26** |  | |
|  |  |  |  |  | **(2.57)** |  | **(3.43)** |  | **(3.01)** |  | **(2.37)** |  | **(2.48)** |  | **(2.84)** |  | **(2.92)** |  | **(2.61)** |  | **(2.28)** |  | **(2.24)** |  | |
|  |  |  | Medical doctors |  | 6.00 |  | 6.00 |  | 6.00 |  | 7.50 |  | 1.00 |  | 1.00 |  | 7.50 |  | 8.00 |  | 7.00 |  | 6.00 |  | |
|  |  |  |  |  | (5.66) |  | (5.66) |  | (5.66) |  | (3.54) |  | - |  | - |  | (3.54) |  | (2.83) |  | (1.41) |  | (5.66) |  | |
|  |  |  | Nurses |  | 3.00 |  | 3.67 |  | 3.67 |  | 4.00 |  | 4.33 |  | 4.33 |  | 3.00 |  | 3.50 |  | 5.67 |  | 5.00 |  | |
|  |  |  |  |  | (1.41) |  | (1.53) |  | (1.53) |  | (1.00) |  | (0.58) |  | (0.58) |  | (0.00) |  | (0.71) |  | (2.08) |  | (0.00) |  | |
|  |  |  | Allied health professionals |  | 4.59 |  | 6.22 |  | 6.00 |  | 4.73 |  | 4.71 |  | 4.25 |  | 3.76 |  | 4.13 |  | 6.18 |  | 6.64 |  | |
|  |  |  |  |  | (2.27) |  | (3.90) |  | (3.26) |  | (2.34) |  | (2.79) |  | (3.33) |  | (2.86) |  | (2.42) |  | (2.63) |  | (2.02) |  | |
|  |  |  | Other |  | 6.00 |  | 4.00 |  | 5.50 |  | 6.00 |  | 6.50 |  | 7.00 |  | 6.50 |  | 6.50 |  | 5.50 |  | 7.00 |  | |
|  |  |  |  |  | (2.83) |  | (0.00) |  | (0.71) |  | (2.83) |  | (2.12) |  | (1.41) |  | (2.12) |  | (2.12) |  | (0.71) |  | (2.83) |  | |
|  |  |  | Academic |  | 6.00 |  | 7.67 |  | 6.00 |  | 5.33 |  | 4.33 |  | 3.33 |  | 6.00 |  | 5.33 |  | 7.00 |  | 5.00 |  | |
|  |  |  |  |  | (3.46) |  | (3.21) |  | (3.46) |  | (2.89) |  | (2.08) |  | (2.08) |  | (3.00) |  | (3.51) |  | (2.00) |  | (1.73) |  | |
|  | **Other** |  |  |  | **5.23** |  | **5.50** |  | **5.42** |  | **5.08** |  | **5.25** |  | **5.50** |  | **5.31** |  | **4.92** |  | **4.85** |  | **5.54** |  | |
|  |  |  |  |  | **(2.42)** |  | **(2.47)** |  | **(2.78)** |  | **(2.61)** |  | **(2.30)** |  | **(2.50)** |  | **(2.32)** |  | **(2.36)** |  | **(2.30)** |  | **(2.70)** |  | |
|  |  |  | Medical doctors |  | 7.00 |  | 7.00 |  | 7.50 |  | 7.50 |  | 7.50 |  | 7.50 |  | 7.00 |  | 7.00 |  | 7.00 |  | 7.50 |  | |
|  |  |  |  |  | (2.83) |  | (2.83) |  | (3.54) |  | (3.54) |  | (3.54) |  | (3.54) |  | (2.83) |  | (2.83) |  | (2.83) |  | (3.54) |  | |
|  |  |  | Nurses |  | 4.00 |  | 8.00 |  | 7.00 |  | 4.00 |  | 3.00 |  | 3.00 |  | 2.00 |  | 4.00 |  | 4.00 |  | 5.00 |  | |
|  |  |  |  |  | - |  | - |  | - |  | - |  | - |  | - |  | - |  | - |  | - |  | - |  | |
|  |  |  | Allied health professionals |  | 4.20 |  | 4.25 |  | 4.00 |  | 4.60 |  | 4.75 |  | 5.00 |  | 4.80 |  | 3.20 |  | 3.40 |  | 3.80 |  | |
|  |  |  |  |  | (2.28) |  | (1.71) |  | (2.94) |  | (2.70) |  | (1.71) |  | (2.45) |  | (2.39) |  | (2.28) |  | (2.30) |  | (2.77) |  | |
|  |  |  | Other |  | 6.50 |  | 6.50 |  | 6.50 |  | 5.00 |  | 6.50 |  | 7.00 |  | 7.00 |  | 7.00 |  | 7.00 |  | 7.00 |  | |
|  |  |  |  |  | (2.12) |  | (2.12) |  | (2.12) |  | - |  | (2.12) |  | (2.83) |  | (1.41) |  | (1.41) |  | (1.41) |  | (1.41) |  | |
|  |  |  | Academic |  | 5.33 |  | 4.67 |  | 4.67 |  | 4.67 |  | 4.33 |  | 4.67 |  | 5.00 |  | 5.33 |  | 4.67 |  | 6.33 |  | |
|  |  |  |  |  | (3.21) |  | (3.51) |  | (3.06) |  | (3.06) |  | (2.31) |  | (2.08) |  | (2.00) |  | (1.15) |  | (1.15) |  | (2.52) |  | |
|  | **North America** |  |  |  | **5.25** |  | **5.67** |  | **5.67** |  | **5.67** |  | **5.25** |  | **4.50** |  | **5.75** |  | **5.25** |  | **6.75** |  | **4.33** |  | |
|  |  |  |  |  | **(3.77)** |  | **(4.51)** |  | **(4.51)** |  | **(4.51)** |  | **(3.77)** |  | **(3.87)** |  | **(4.03)** |  | **(4.03)** |  | **(3.95)** |  | **(4.93)** |  | |
|  |  |  | Medical doctors |  | 1.00 |  | 1.00 |  | 1.00 |  | 1.00 |  | 1.00 |  | 1.00 |  | 1.00 |  | 1.00 |  | 1.00 |  | 1.00 |  | |
|  |  |  |  |  | - |  | - |  | - |  | - |  | - |  | - |  | - |  | - |  | - |  | - |  | |
|  |  |  | Nurses |  | 6.00 |  | 6.00 |  | 6.00 |  | 6.00 |  | 6.00 |  | 3.00 |  | 8.00 |  | 7.00 |  | 8.00 |  | 2.00 |  | |
|  |  |  |  |  | - |  | - |  | - |  | - |  | - |  | - |  | - |  | - |  | - |  | - |  | |
|  |  |  | Allied health professionals |  | 4.00 |  | - |  | - |  | - |  | 4.00 |  | 4.00 |  | 4.00 |  | 3.00 |  | 8.00 |  | - |  | |
|  |  |  |  |  | - |  | - |  | - |  | - |  | - |  | - |  | - |  | - |  | - |  | - |  | |
|  |  |  | Other |  | - |  | - |  | - |  | - |  | - |  | - |  | - |  | - |  | - |  | - |  | |
|  |  |  |  |  | - |  | - |  | - |  | - |  | - |  | - |  | - |  | - |  | - |  | - |  | |
|  |  |  | Academic |  | 10.0 |  | 10.0 |  | 10.0 |  | 10.0 |  | 10.0 |  | 10.0 |  | 10.0 |  | 10.0 |  | 10.0 |  | 10.0 |  | |
|  |  |  |  |  | - |  | - |  | - |  | - |  | - |  | - |  | - |  | - |  | - |  | - |  | |
|  |  |  |  |  |  |  |  |  |  |  |  |  |  |  |  |  |  |  |  |  |  |  |  |  | |
