# Supplementary material for: Identifying and assessing expertise gaps in healthcare education across Europe: a cross-sectional study
Source: Research Square preprint supplement (doi:10.21203/rs.3.rs-7934532/v1), 2025-12-22
Supplement: Supplementary file 2 [file 3c387a1cdb76b5a837ad41a8.docx]

| **Supplementary file 3. Expertise gaps in terms of PRACTICE across the Professional Groups and European Regions**  **Legend:** B2.1. academic levels of gap in Secondary Level (EQF4); B2.2. academic levels of gap in Post Secondary Level (EQF5); B2.3. academic levels of gap in Bachelor’s Degree (EQF6); B2.4. academic levels of gap in Master’s Degree (EQF7); A2.5. academic levels of gap in PhD/Doctorate (EQF8); B3. RESEARCH gap in terms of HARD SKILLS; B4. RESEARCH gap in terms of TRANSVERSAL SKILLS; B5. RESEARCH gap in terms of DIGITAL SKILLS; B6. RESEARCH gap in terms of GREEN SKILLS | | | | | | | | | | | | | | | | | | | | | | | | | | |
| --- | --- | --- | --- | --- | --- | --- | --- | --- | --- | --- | --- | --- | --- | --- | --- | --- | --- | --- | --- | --- | --- | --- | --- | --- | --- | --- |
| **Geographical area** | | **Profession** | | **B1** | | **B2.1** | | **B2.2** | | **B2.3** | | **B2.4** | | **B2.5** | | **B4** | | **B5** | | **B6** | | **B7** | | |
|  | |  | | **MEAN**  **(SD)** | | **MEAN**  **(SD)** | | **MEAN**  **(SD)** | | **MEAN**  **(SD)** | | **MEAN**  **(SD)** | | **MEAN**  **(SD)** | | **MEAN**  **(SD)** | | **MEAN**  **(SD)** | | **MEAN**  **(SD)** | | **MEAN**  **(SD)** | | |
|  |  |  |  |  | **4.61** |  | **6.19** |  | **5.68** |  | **4.68** |  | **4.75** |  | **4.79** |  | **4.43** |  | **4.65** |  | **5.03** |  | **5.96** |  | |
|  |  |  |  |  | **(2.21)** |  | **(3.03)** |  | **(2.76)** |  | **(2.47)** |  | **(2.66)** |  | **(2.97)** |  | **(2.24)** |  | **(2.15)** |  | **(2.26)** |  | **(2.29)** |  | |
|  | **Eastern Europe** |  |  |  | **5.33** |  | **4.00** |  | **4.33** |  | **5.00** |  | **6.33** |  | **6.67** |  | **3.67** |  | **4.50** |  | **4.33** |  | **6.00** |  | |
|  |  |  |  |  | **(2.94)** |  | **(2.53)** |  | **(2.42)** |  | **(2.53)** |  | **(3.01)** |  | **(2.94)** |  | **(3.08)** |  | **(2.88)** |  | **(3.20)** |  | **(3.03)** |  | |
|  |  |  | Medical doctors |  | 4.00 |  | 2.00 |  | 3.50 |  | 4.00 |  | 4.50 |  | 5.00 |  | 1.00 |  | 3.50 |  | 4.00 |  | 5.00 |  | |
|  |  |  |  |  | (2.83) |  | (0.00) |  | (0.71) |  | (0.00) |  | (0.71) |  | (1.41) |  | (0.00) |  | (3.54) |  | (4.24) |  | (5.66) |  | |
|  |  |  | Nurses |  | - |  | - |  | - |  | - |  | - |  | - |  | - |  | - |  | - |  | - |  | |
|  |  |  |  |  | - |  | - |  | - |  | - |  | - |  | - |  | - |  | - |  | - |  | - |  | |
|  |  |  | Allied health professionals |  | 5.00 |  | 4.00 |  | 3.00 |  | 3.50 |  | 6.50 |  | 6.50 |  | 3.50 |  | 3.00 |  | 2.00 |  | 5.00 |  | |
|  |  |  |  |  | (4.24) |  | (2.83) |  | (1.41) |  | (0.71) |  | (4.95) |  | (4.95) |  | (2.12) |  | (1.41) |  | (0.00) |  | (0.00) |  | |
|  |  |  | Other |  | 9.00 |  | 8.00 |  | 9.00 |  | 10.0 |  | 10.0 |  | 10.0 |  | 9.00 |  | 9.00 |  | 9.00 |  | 9.00 |  | |
|  |  |  |  |  | - |  | - |  | - |  | - |  | - |  | - |  | - |  | - |  | - |  | - |  | |
|  |  |  | Academic |  | 5.00 |  | 4.00 |  | 4.00 |  | 5.00 |  | 6.00 |  | 7.00 |  | 4.00 |  | 5.00 |  | 5.00 |  | 7.00 |  | |
|  |  |  |  |  | - |  | - |  | - |  | - |  | - |  | - |  | - |  | - |  | - |  | - |  | |
|  | **Northern Europe** |  |  |  | **4.16** |  | **5.69** |  | **5.03** |  | **4.06** |  | **4.40** |  | **4.65** |  | **4.17** |  | **4.11** |  | **4.32** |  | **5.66** |  | |
|  |  |  |  |  | **(2.14)** |  | **(3.27)** |  | **(2.76)** |  | **(2.17)** |  | **(2.38)** |  | **(2.79)** |  | **(2.31)** |  | **(2.14)** |  | **(2.39)** |  | **(2.15)** |  | |
|  |  |  | Medical doctors |  | 3.00 |  | 6.60 |  | 5.00 |  | 3.80 |  | 3.00 |  | 3.60 |  | 2.60 |  | 3.20 |  | 3.40 |  | 6.20 |  | |
|  |  |  |  |  | (1.58) |  | (4.22) |  | (4.12) |  | (2.49) |  | (1.87) |  | (3.13) |  | (0.548) |  | (1.64) |  | (1.52) |  | (2.59) |  | |
|  |  |  | Nurses |  | 5.00 |  | 3.83 |  | 4.17 |  | 4.67 |  | 5.83 |  | 6.17 |  | 6.00 |  | 5.00 |  | 6.00 |  | 5.20 |  | |
|  |  |  |  |  | (2.00) |  | (1.72) |  | (1.94) |  | (2.34) |  | (2.14) |  | (2.32) |  | (2.38) |  | (2.16) |  | (3.21) |  | (2.86) |  | |
|  |  |  | Allied health professionals |  | 4.15 |  | 5.83 |  | 5.28 |  | 3.95 |  | 4.25 |  | 4.53 |  | 4.00 |  | 4.05 |  | 4.15 |  | 5.83 |  | |
|  |  |  |  |  | (2.30) |  | (3.43) |  | (2.80) |  | (2.21) |  | (2.61) |  | (3.06) |  | (2.29) |  | (2.39) |  | (2.16) |  | (2.04) |  | |
|  |  |  | Other |  | 3.00 |  | 9.00 |  | 4.00 |  | 3.00 |  | 4.50 |  | 4.50 |  | 2.50 |  | 4.50 |  | 3.00 |  | 6.00 |  | |
|  |  |  |  |  | (1.41) |  | - |  | - |  | (0.00) |  | (0.71) |  | (0.71) |  | (0.71) |  | (0.71) |  | (0.00) |  | (0.00) |  | |
|  |  |  | Academic |  | 5.00 |  | 6.00 |  | 6.00 |  | 5.00 |  | 5.00 |  | 4.00 |  | 5.00 |  | 3.50 |  | 3.00 |  | 3.50 |  | |
|  |  |  |  |  | (2.83) |  | (2.83) |  | (2.83) |  | (2.83) |  | (1.41) |  | (1.41) |  | (2.83) |  | (0.71) |  | (1.41) |  | (0.71) |  | |
|  | **Southern Europe** |  |  |  | **4.69** |  | **6.44** |  | **5.89** |  | **4.69** |  | **4.63** |  | **4.59** |  | **4.43** |  | **4.80** |  | **5.03** |  | **6.01** |  | |
|  |  |  |  |  | **(2.14)** |  | **(2.95)** |  | **(2.75)** |  | **(2.48)** |  | **(2.62)** |  | **(2.92)** |  | **(2.10)** |  | **(2.02)** |  | **(2.16)** |  | **(2.27)** |  | |
|  |  |  | Medical doctors |  | 4.35 |  | 5.57 |  | 5.24 |  | 4.57 |  | 3.90 |  | 3.65 |  | 4.17 |  | 4.43 |  | 4.83 |  | 5.26 |  | |
|  |  |  |  |  | (2.01) |  | (3.19) |  | (3.05) |  | (2.75) |  | (2.55) |  | (2.39) |  | (1.95) |  | (1.73) |  | (2.23) |  | (2.42) |  | |
|  |  |  | Nurses |  | 4.06 |  | 5.57 |  | 5.36 |  | 3.93 |  | 4.00 |  | 4.36 |  | 3.67 |  | 4.39 |  | 5.00 |  | 6.24 |  | |
|  |  |  |  |  | (1.78) |  | (2.87) |  | (2.82) |  | (2.43) |  | (2.22) |  | (2.79) |  | (1.78) |  | (1.94) |  | (2.20) |  | (2.17) |  | |
|  |  |  | Allied health professionals |  | 4.61 |  | 6.87 |  | 6.13 |  | 4.70 |  | 4.85 |  | 4.84 |  | 4.38 |  | 4.89 |  | 4.95 |  | 6.11 |  | |
|  |  |  |  |  | (2.199 |  | (2.87) |  | (2.67) |  | (2.42) |  | (2.71) |  | (3.04) |  | (2.11) |  | (2.18) |  | (2.18) |  | (2.31) |  | |
|  |  |  | Other |  | 6.78 |  | 7.38 |  | 7.00 |  | 6.33 |  | 5.88 |  | 5.63 |  | 6.33 |  | 5.33 |  | 5.89 |  | 6.11 |  | |
|  |  |  |  |  | (1.56) |  | (1.85) |  | (2.14) |  | (2.24) |  | (2.80) |  | (3.38) |  | (1.87) |  | (1.41) |  | (2.20) |  | (2.15) |  | |
|  |  |  | Academic |  | 5.67 |  | 5.50 |  | 5.17 |  | 4.33 |  | 4.33 |  | 4.00 |  | 5.50 |  | 5.33 |  | 5.67 |  | 6.67 |  | |
|  |  |  |  |  | (1.97) |  | (3.83) |  | (3.13) |  | (2.25) |  | (1.86) |  | (2.61) |  | (2.26) |  | (1.869 |  | (1.51) |  | (1.75) |  | |
|  | **Western Europe** |  |  |  | **4.19** |  | **6.50** |  | **6.14** |  | **4.75** |  | **4.83** |  | **4.74** |  | **4.59** |  | **4.30** |  | **5.78** |  | **6.16** |  | |
|  |  |  |  |  | **(2.25)** |  | **(3.15)** |  | **(2.76)** |  | **(2.67)** |  | **(3.16)** |  | **(3.44)** |  | **(2.44)** |  | **(2.27)** |  | **(2.06)** |  | **(2.12)** |  | |
|  |  |  | Medical doctors |  | 5.00 |  | 6.00 |  | 5.50 |  | 6.50 |  | 5.50 |  | 5.50 |  | 5.50 |  | 7.50 |  | 6.00 |  | 6.00 |  | |
|  |  |  |  |  | (4.24) |  | (5.66) |  | (4.95) |  | (3.54) |  | (6.36) |  | (6.36) |  | (3.54) |  | (2.12) |  | (0.00) |  | (5.66) |  | |
|  |  |  | Nurses |  | 5.00 |  | 5.33 |  | 5.00 |  | 5.67 |  | 5.67 |  | 6.00 |  | 5.00 |  | 5.33 |  | 7.00 |  | 6.50 |  | |
|  |  |  |  |  | (1.73) |  | (2.08) | () | 2(.00) |  | (2.089 |  | (2.52) |  | (2.65) |  | (1.73) |  | (1.15) |  | (1.00) |  | (0.71) |  | |
|  |  |  | Allied health professionals |  | 3.71 |  | 6.90 |  | 6.09 |  | 4.14 |  | 4.62 |  | 4.31 |  | 4.00 |  | 3.18 |  | 5.35 |  | 6.50 |  | |
|  |  |  |  |  | (1.99) |  | (3.54) |  | (3.02) |  | (2.66) |  | (3.20) |  | (3.57) |  | (2.52) |  | (1.47) |  | (1.93) |  | (1.63) |  | |
|  |  |  | Other |  | 5.50 |  | 5.50 |  | 9.00 |  | 6.00 |  | 6.00 |  | 6.00 |  | 5.00 |  | 4.00 |  | 6.00 |  | 6.00 |  | |
|  |  |  |  |  | (4.95) |  | (4.95) |  | (1.41) |  | (5.66) |  | (5.66) |  | (5.66) |  | (2.83) |  | (1.41) |  | (4.24) |  | (4.24) |  | |
|  |  |  | Academic |  | 4.67 |  | 7.33 |  | 6.00 |  | 4.67 |  | 3.67 |  | 4.00 |  | 6.67 |  | 7.67 |  | 6.67 |  | 4.33 |  | |
|  |  |  |  |  | (2.08) |  | (0.58) |  | (1.73) |  | (1.15) |  | (0.58) |  | (2.00) |  | (1.53) |  | (2.31) |  | (3.21) |  | (1.53) |  | |
|  | **Other** |  |  |  | **5.38** |  | **5.17** |  | **5.08** |  | **5.69** |  | **5.73** |  | **6.17** |  | **5.23** |  | **5.25** |  | **5.38** |  | **5.92** |  | |
|  |  |  |  |  | **(2.29)** |  | **(2.86)** |  | **(2.61)** |  | **(2.36)** |  | **(2.41)** |  | **(2.48)** |  | **(2.39)** |  | **(2.38)** |  | **(2.06)** |  | **(2.43)** |  | |
|  |  |  | Medical doctors |  | 5.50 |  | 7.00 |  | 7.00 |  | 7.50 |  | 7.50 |  | 7.50 |  | 6.00 |  | 7.50 |  | 7.50 |  | 7.50 |  | |
|  |  |  |  |  | (4.95) |  | (2.83) |  | (2.83) |  | (3.54) |  | (3.54) |  | (3.54) |  | (4.24) |  | (2.12) |  | (3.54) |  | (3.54) |  | |
|  |  |  | Nurses |  | 7.00 |  | 8.00 |  | 7.00 |  | 6.00 |  | 2.00 |  | 2.00 |  | 3.00 |  | 4.00 |  | 3.00 |  | 5.00 |  | |
|  |  |  |  |  | - |  | - |  | - |  | - |  | - |  | - |  | - |  | - |  | - |  | - |  | |
|  |  |  | Allied health professionals |  | 4.20 |  | 3.25 |  | 2.75 |  | 4.00 |  | 5.25 |  | 6.25 |  | 4.20 |  | 3.60 |  | 4.00 |  | 3.80 |  | |
|  |  |  |  |  | (1.79) |  | (2.06) |  | (1.71) |  | (2.00) |  | (2.06) |  | (2.75) |  | (1.92) |  | (1.82) |  | (1.00) |  | (1.30) |  | |
|  |  |  | Other |  | 6.00 |  | 6.00 |  | 6.50 |  | 6.50 |  | 5.00 |  | 6.00 |  | 6.50 |  | 7.00 |  | 7.50 |  | 7.00 |  | |
|  |  |  |  |  | (1.41) |  | (0.00) |  | (0.71) |  | (0.71) |  | - |  | (1.41) |  | (0.71) |  | - |  | (0.71) |  | (1.41) |  | |
|  |  |  | Academic |  | 6.33 |  | 5.00 |  | 5.33 |  | 6.67 |  | 6.67 |  | 6.67 |  | 6.33 |  | 6.33 |  | 5.67 |  | 8.00 |  | |
|  |  |  |  |  | (2.31) |  | (4.36) |  | (3.21) |  | (2.52) |  | (2.08) |  | (2.08) |  | (2.89) |  | (2.52) |  | (0.58) |  | (1.73) |  | |
|  | **North America** |  |  |  | **5.67** |  | **9.00** |  | **6.50** |  | **6.50** |  | **6.00** |  | **5.33** |  | **4.25** |  | **5.50** |  | **6.25** |  | **5.75** |  | |
|  |  |  |  |  | **(4.04)** |  | **(1.41)** |  | **(4.95)** |  | **(4.95)** |  | **(3.61)** |  | **(4.51)** |  | **(4.03)** |  | **(3.87)** |  | **(3.86)** |  | **(4.43)** |  | |
|  |  |  | Medical doctors |  | - |  | - |  | - |  | - |  | - |  | - |  | 1.00 |  | 1.00 |  | 1.00 |  | 1.00 |  | |
|  |  |  |  |  | - |  | - |  | - |  | - |  | - |  | - |  | - |  | - |  | - |  | - |  | |
|  |  |  | Nurses |  | 2.00 |  | 8.00 |  | 3.00 |  | 3.00 |  | 3.00 |  | 1.00 |  | 2.00 |  | 7.00 |  | 6.00 |  | 3.00 |  | |
|  |  |  |  |  | - |  | - |  | - |  | - |  | - |  | - |  | - |  | - |  | - |  | - |  | |
|  |  |  | Allied health professionals |  | 5.00 |  | - |  | - |  | - |  | 5.00 |  | 5.00 |  | 4.00 |  | 4.00 |  | 8.00 |  | 9.00 |  | |
|  |  |  |  |  |  |  |  |  |  |  |  |  |  |  |  |  |  |  |  |  |  |  |  |  | |
|  |  |  | Other |  | - |  | - |  | - |  | - |  | - |  | - |  | - |  | - |  | - |  | - |  | |
|  |  |  |  |  | - |  | - |  | - |  | - |  | - |  | - |  | - |  | - |  | - |  | - |  | |
|  |  |  | Academic |  | 10.0 |  | 10.0 |  | 10.0 |  | 10.0 |  | 10.0 |  | 10.0 |  | 10.0 |  | 10.0 |  | 10.0 |  | 10.0 |  | |
|  |  |  |  |  | - |  | - |  | - |  | - |  | - |  | - |  | - |  | - |  | - |  | - |  | |
|  |  |  |  |  |  |  |  |  |  |  |  |  |  |  |  |  |  |  |  |  |  |  |  |  | |
|  | | | | | | | | | | | | | | | | | | | | | | | | | | |
