# Supplementary material for: Identifying and assessing expertise gaps in healthcare education across Europe: a cross-sectional study
Source: Research Square preprint supplement (doi:10.21203/rs.3.rs-7934532/v1), 2025-12-22
Supplement: Supplementary file 3 [file 92956b568bbb17600059cfcf.docx]

**Supplementary file 4. Expertise gaps in terms of RESEARCH across the Professional Groups and European Regions**

**Legend:** C2.1. academic levels of gap in Secondary Level (EQF4); C2.2. academic levels of gap in Post Secondary Level (EQF5); C2.3. academic levels of gap in Bachelor’s Degree (EQF6); C2.4. academic levels of gap in Master’s Degree (EQF7); C2.5. academic levels of gap in PhD/Doctorate (EQF8); C3. RESEARCH gap in terms of HARD SKILLS; C4. RESEARCH gap in terms of TRANSVERSAL SKILLS; C5. RESEARCH gap in terms of DIGITAL SKILLS; C6. RESEARCH gap in terms of GREEN SKILLS

| **Geographical area** | | **Profession** | | **C1** | | **C2.1** | | **C2.2** | | **C2.3** | | **C2.4** | | **C2.5** | | **C3** | | **C4** | | **C5** | | **C6** | | |
| --- | --- | --- | --- | --- | --- | --- | --- | --- | --- | --- | --- | --- | --- | --- | --- | --- | --- | --- | --- | --- | --- | --- | --- | --- |
|  | |  | | **MEAN**  **(SD)** | | **MEAN**  **(SD)** | | **MEAN**  **(SD)** | | **MEAN**  **(SD)** | | **MEAN**  **(SD)** | | **MEAN**  **(SD)** | | **MEAN**  **(SD)** | | **MEAN**  **(SD)** | | **MEAN**  **(SD)** | | **MEAN**  **(SD)** | | |
|  |  |  |  |  | **6.24** |  | **6.92** |  | **6.56** |  | **5.42** |  | **4.65** |  | **4.14** |  | **5.65** |  | **5.50** |  | **5.59** |  | **6.27** |  | |
|  |  |  |  |  | **(2.44)** |  | **(2.92)** |  | **(2.69)** |  | **(2.47)** |  | **(2.54)** |  | **(2.92)** |  | **(2.36)** |  | **(2.29)** |  | **(2.37)** |  | **(2.41)** |  | |
|  |  |  |  |  |  |  |  |  |  |  |  |  |  |  |  |  |  |  |  |  |  |  |  |  | |
|  | **Eastern Europe** |  |  |  | **7.60** |  | **4.80** |  | **5.20** |  | **5.80** |  | **5.00** |  | **5.40** |  | **5.80** |  | **6.80** |  | **5.80** |  | **7.40** |  | |
|  |  |  |  |  | **(1.14)** |  | **(3.49)** |  | **(3.27)** |  | **(3.42)** |  | **(3.08)** |  | **(3.29)** |  | **(2.05)** |  | **(2.17)** |  | **(3.11)** |  | **(2.30)** |  | |
|  |  |  | Medical doctors |  | 9.00 |  | 2.00 |  | 2.50 |  | 3.00 |  | 3.50 |  | 4.00 |  | 6.00 |  | 9.00 |  | 9.00 |  | 10.0 |  | |
|  |  |  |  |  | - |  | (1.41) |  | (2.12) |  | (2.83) |  | (3.54) |  | (4.24) |  | - |  | - |  | - |  | - |  | |
|  |  |  | Nurses |  | - |  | - |  | - |  | - |  | - |  | - |  | - |  | - |  | - |  | - |  | |
|  |  |  |  |  | - |  | - |  | - |  | - |  | - |  | - |  | - |  | - |  | - |  | - |  | |
|  |  |  | Allied health professionals |  | 7.50 |  | 8.00 |  | 8.00 |  | 8.00 |  | 3.00 |  | 3.00 |  | 5.00 |  | 5.00 |  | 3.50 |  | 5.50 |  | |
|  |  |  |  |  | (0.71) |  | - |  | - |  | - |  | - |  | - |  | (1.41) |  | (1.41) |  | (2.12) |  | (2.12) |  | |
|  |  |  | Other |  | 8.00 |  | 9.00 |  | 9.00 |  | 10.0 |  | 9.00 |  | 9.00 |  | 9.00 |  | 9.00 |  | 9.00 |  | 9.00 |  | |
|  |  |  |  |  | - |  | - |  | - |  | - |  | - |  | - |  | - |  | - |  | - |  | - |  | |
|  |  |  | Academic |  | 6.00 |  | 3.00 |  | 4.00 |  | 5.00 |  | 6.00 |  | 7.00 |  | 4.00 |  | 6.00 |  | 4.00 |  | 7.00 |  | |
|  |  |  |  |  | - |  | - |  | - |  | - |  | - |  | - |  | - |  | - |  | - |  | - |  | |
|  | **Northern Europe** |  |  |  | **5.22** |  | **5.87** |  | **5.47** |  | **4.20** |  | **3.69** |  | **3.85** |  | **4.61** |  | **4.68** |  | **4.80** |  | **5.43** |  | |
|  |  |  |  |  | **(2.47)** |  | **(3.34)** |  | **(2.70)** |  | **(2.15)** |  | **(2.15)** |  | **(2.64)** |  | **(2.08)** |  | **(2.03)** |  | **(2.26)** |  | **(2.18)** |  | |
|  |  |  | Medical doctors |  | 4.60 |  | 7.00 |  | 6.00 |  | 4.00 |  | 2.80 |  | 3.00 |  | 4.40 |  | 3.60 |  | 3.80 |  | 6.25 |  | |
|  |  |  |  |  | (2.79) |  | (3.74) |  | (3.08) |  | (2.00) |  | (1.48) |  | (2.83) |  | (2.51) |  | (2.07) |  | (2.17) |  | (3.50) |  | |
|  |  |  | Nurses |  | 5.25 |  | 5.33 |  | 5.80 |  | 5.83 |  | 5.00 |  | 4.50 |  | 5.00 |  | 5.86 |  | 6.00 |  | 5.50 |  | |
|  |  |  |  |  | (2.49) |  | (2.58) |  | (2.28) |  | (1.94) |  | (2.10) |  | (2.07) |  | (1.79) |  | (1.77) |  | (2.83) |  | (2.51) |  | |
|  |  |  | Allied health professionals |  | 5.74 |  | 5.53 |  | 5.24 |  | 3.75 |  | 3.75 |  | 4.32 |  | 4.72 |  | 4.67 |  | 4.56 |  | 5.44 |  | |
|  |  |  |  |  | (2.40) |  | (3.69) |  | (2.93) |  | (2.07) |  | (2.34) |  | (2.81) |  | (2.22) |  | (2.09) |  | (2.04) |  | (1.86) |  | |
|  |  |  | Other |  | 3.50 |  | 8.00 |  | 5.00 |  | 3.50 |  | 2.00 |  | 1.00 |  | 3.50 |  | 4.00 |  | 5.50 |  | 5.00 |  | |
|  |  |  |  |  | (2.12) |  | - |  | - |  | (0.71) |  | (0.00) |  | (0.00) |  | (0.71) |  | (0.00) |  | (0.71) |  | (1.41) |  | |
|  |  |  | Academic |  | 3.50 |  | 6.50 |  | 5.50 |  | 5.00 |  | 3.00 |  | 2.50 |  | 4.00 |  | 4.00 |  | 4.00 |  | 4.00 |  | |
|  |  |  |  |  | (3.54) |  | (3.54) |  | (3.54) |  | (4.24) |  | (1.41) |  | (2.12) |  | (2.83) |  | (2.83) |  | (2.83) |  | (2.83) |  | |
|  | **Southern Europe** |  |  |  | **6.43** |  | **7.30** |  | **6.77** |  | **5.63** |  | **4.81** |  | **4.12** |  | **5.75** |  | **5.66** |  | **5.64** |  | **6.39** |  | |
|  |  |  |  |  | **(2.29)** |  | **(2.67)** |  | **(2.60)** |  | **(2.40)** |  | **(2.51)** |  | **(2.92)** |  | **(2.24)** |  | **(2.21)** |  | **(2.31)** |  | **(2.39)** |  | |
|  |  |  | Medical doctors |  | 6.22 |  | 6.19 |  | 5.71 |  | 5.19 |  | 4.48 |  | 3.95 |  | 4.65 |  | 4.96 |  | 5.17 |  | 5.65 |  | |
|  |  |  |  |  | (2.07) |  | (2.64) |  | (2.57) |  | (2.52) |  | (2.04) |  | (2.48) |  | (2.08) |  | (2.01) |  | (2.27) |  | (2.44) |  | |
|  |  |  | Nurses |  | 5.72 |  | 7.43 |  | 6.93 |  | 5.64 |  | 4.33 |  | 2.93 |  | 5.29 |  | 5.59 |  | 5.71 |  | 6.35 |  | |
|  |  |  |  |  | (2.49) |  | (2.56) |  | (2.62) |  | (2.59) |  | (2.55) |  | (2.02) |  | (2.39) |  | (2.37) |  | (2.37) |  | (2.29) |  | |
|  |  |  | Allied health professionals |  | 6.67 |  | 7.48 |  | 6.95 |  | 5.72 |  | 4.99 |  | 4.34 |  | 6.08 |  | 5.90 |  | 5.72 |  | 6.59 |  | |
|  |  |  |  |  | (2.31) |  | (2.82) |  | (2.71) |  | (2.46) |  | (2.64) |  | (3.13) |  | (2.14) |  | (2.19) |  | (2.36) |  | (2.33) |  | |
|  |  |  | Other |  | 5.89 |  | 7.38 |  | 7.13 |  | 5.78 |  | 5.00 |  | 4.63 |  | 6.33 |  | 5.00 |  | 5.22 |  | 6.11 |  | |
|  |  |  |  |  | (2.09) |  | (1.85) |  | (2.10) |  | (1.92) |  | (2.93) |  | (3.50) |  | (2.50) |  | (2.12) |  | (1.72) |  | (2.67) |  | |
|  |  |  | Academic |  | 6.83 |  | 8.67 |  | 7.67 |  | 5.83 |  | 4.83 |  | 4.33 |  | 6.17 |  | 6.50 |  | 6.83 |  | 7.33 |  | |
|  |  |  |  |  | (2.48) |  | (1.21) |  | (1.21) |  | (1.72) |  | (2.23) |  | (2.94) |  | (2.56) |  | (2.74) |  | (2.56) |  | (2.94) |  | |
|  | **Western Europe** |  |  |  | **6.69** |  | **7.67** |  | **7.79** |  | **5.96** |  | **4.65** |  | **3.82** |  | **6.50** |  | **5.46** |  | **6.42** |  | **6.58** |  | |
|  |  |  |  |  | **(2.81)** |  | **(2.93)** |  | **(2.35)** |  | **(2.71)** |  | **(2.82)** |  | **(3.25)** |  | **(2.75)** |  | **(2.45)** |  | **(2.39)** |  | **(2.38)** |  | |
|  |  |  | Medical doctors |  | 5.00 |  | 5.50 |  | 6.00 |  | 7.00 |  | 3.50 |  | 1.00 |  | 5.50 |  | 6.50 |  | 5.50 |  | 6.50 |  | |
|  |  |  |  |  | (5.66) |  | (4.95) |  | (4.24) |  | (2.83) |  | (3.54) |  | - |  | (4.95) |  | (3.54) |  | (2.12) |  | (4.95) |  | |
|  |  |  | Nurses |  | 7.33 |  | 9.00 |  | 8.67 |  | 6.33 |  | 5.00 |  | 4.00 |  | 6.33 |  | 5.67 |  | 6.33 |  | 6.50 |  | |
|  |  |  |  |  | (1.53) |  | (0.00) |  | (0.58) |  | (0.58) |  | (1.00) |  | (1.73) |  | (0.58) |  | (1.53) |  | (1.53) |  | (0.71) |  | |
|  |  |  | Allied health professionals |  | 6.59 |  | 8.33 |  | 8.00 |  | 5.33 |  | 4.21 |  | 3.50 |  | 6.47 |  | 5.12 |  | 6.07 |  | 6.81 |  | |
|  |  |  |  |  | (2.62) |  | (2.87) |  | (2.16) |  | (2.85) |  | (2.89) |  | (3.50) |  | (3.00) |  | (2.47) |  | (2.63) |  | (2.43) |  | |
|  |  |  | Other |  | 9.00 |  | 6.00 |  | 10.0 |  | 10.0 |  | 10.0 |  | 10.0 |  | 8.00 |  | 8.00 |  | 10.0 |  | 7.00 |  | |
|  |  |  |  |  | - |  | - |  | - |  | - |  | - |  | - |  | - |  | - |  | - |  | - |  | |
|  |  |  | Academic |  | 7.00 |  | 6.33 |  | 6.67 |  | 6.67 |  | 5.33 |  | 4.00 |  | 7.00 |  | 5.67 |  | 7.67 |  | 5.33 |  | |
|  |  |  |  |  | (4.36) |  | (3.79) |  | (3.21) |  | (3.21) |  | (2.89) |  | (2.00) |  | (2.65) |  | (3.51) |  | (1.53) |  | (2.31) |  | |
|  | **Other** |  |  |  | **5.92** |  | **6.09** |  | **6.09** |  | **6.08** |  | **5.45** |  | **5.09** |  | **5.54** |  | **5.85** |  | **5.46** |  | **6.31** |  | |
|  |  |  |  |  | **(1.98)** |  | **(2.70)** |  | **(2.51)** |  | **(2.23)** |  | **(2.25)** |  | **(2.63)** |  | **(2.40)** |  | **(2.67)** |  | **(2.30)** |  | **(2.46)** |  | |
|  |  |  | Medical doctors |  | 7.00 |  | 7.50 |  | 7.50 |  | 8.00 |  | 7.00 |  | 7.00 |  | 6.50 |  | 8.50 |  | 6.50 |  | 7.50 |  | |
|  |  |  |  |  | (1.41) |  | (0.71) |  | (0.71) |  | (1.41) |  | (4.24) |  | (4.24) |  | (3.54) |  | (2.12) |  | (2.12) |  | (0.71) |  | |
|  |  |  | Nurses |  | 5.00 |  | 8.00 |  | 8.00 |  | 5.00 |  | 3.00 |  | 1.00 |  | 3.00 |  | 4.00 |  | 3.00 |  | 5.00 |  | |
|  |  |  |  |  | - |  | - |  | - |  | - |  | - |  | - |  | - |  | - |  | - |  | - |  | |
|  |  |  | Allied health professionals |  | 5.20 |  | 4.75 |  | 4.75 |  | 5.80 |  | 5.25 |  | 6.25 |  | 5.20 |  | 4.80 |  | 5.00 |  | 5.00 |  | |
|  |  |  |  |  | (2.28) |  | (2.63) |  | (2.63) |  | (2.59) |  | (1.71) |  | (1.50) |  | (2.86) |  | (3.27) |  | (3.08) |  | (3.08) |  | |
|  |  |  | Other |  | 7.00 |  | 8.00 |  | 7.00 |  | 6.00 |  | 6.00 |  | 5.00 |  | 6.50 |  | 6.50 |  | 7.50 |  | 8.00 |  | |
|  |  |  |  |  | (1.41) |  | - |  | - |  | - |  | - |  | - |  | (0.71) |  | (0.71) |  | (0.71) |  | (0.00) |  | |
|  |  |  | Academic |  | 6.00 |  | 5.67 |  | 6.00 |  | 5.67 |  | 5.33 |  | 3.67 |  | 5.67 |  | 6.00 |  | 5.00 |  | 7.00 |  | |
|  |  |  |  |  | (2.65) |  | (4.04) |  | (3.61) |  | (2.89) |  | (2.52) |  | (2.08) |  | (2.52) |  | (2.65) |  | (1.00) |  | (2.65) |  | |
|  | **North America** |  |  |  | **5.00** |  | **5.33** |  | **5.33** |  | **2.00** |  | **5.50** |  | **5.00** |  | **5.50** |  | **4.50** |  | **5.75** |  | **4.67** |  | |
|  |  |  |  |  | **(4.69)** |  | **(4.51)** |  | **(4.51)** |  | **(1.41)** |  | **(4.20)** |  | **(4.24)** |  | **(4.20)** |  | **(4.04)** |  | **(4.03)** |  | **(4.73)** |  | |
|  |  |  | Medical doctors |  | 1.00 |  | 1.00 |  | 1.00 |  | 1.00 |  | 1.00 |  | 1.00 |  | 1.00 |  | 1.00 |  | 1.00 |  | 1.00 |  | |
|  |  |  |  |  | - |  | - |  | - |  | - |  | - |  | - |  | - |  | - |  | - |  | - |  | |
|  |  |  | Nurses |  | 1.00 |  | 5.00 |  | 5.00 |  | 3.00 |  | 3.00 |  | 2.00 |  | 3.00 |  | 2.00 |  | 4.00 |  | 3.00 |  | |
|  |  |  |  |  | - |  | - |  | - |  | - |  | - |  | - |  | - |  | - |  | - |  | - |  | |
|  |  |  | Allied health professionals |  | 8.00 |  | - |  | - |  | - |  | 8.00 |  | 7.00 |  | 8.00 |  | 5.00 |  | 8.00 |  | - |  | |
|  |  |  |  |  | - |  | - |  | - |  | - |  | - |  | - |  | - |  | - |  | - |  | - |  | |
|  |  |  | Other |  | - |  | - |  | - |  | - |  | - |  | - |  | - |  | - |  | - |  | - |  | |
|  |  |  |  |  | - |  | - |  | - |  | - |  | - |  | - |  | - |  | - |  | - |  | - |  | |
|  |  |  | Academic |  | 10.0 |  | 10.0 |  | 10.0 |  | - |  | 10.0 |  | 10.0 |  | 10.0 |  | 10.0 |  | 10.0 |  | 10.0 |  | |
|  |  |  |  |  | - |  | - |  | - |  | - |  | - |  | - |  | - |  | - |  | - |  | - |  | |
|  |  |  |  |  |  |  |  |  |  |  |  |  |  |  |  |  |  |  |  |  |  |  |  |  | |
