# Supplementary material for: Identifying and assessing expertise gaps in healthcare education across Europe: a cross-sectional study
Source: Research Square preprint supplement (doi:10.21203/rs.3.rs-7934532/v1), 2025-12-22
Supplement: Supplementary file 4 [file 94fca21d88c55ac66f66d27a.docx]

| **Supplementary file 2. Expertise gaps in terms of KNOWLEDGE** **across the Professional Groups and European Regions**  **Legend:** A2.1. academic levels of gap in Secondary Level (EQF4); A2.2. academic levels of gap in Post Secondary Level (EQF5); A2.3. academic levels of gap in Bachelor’s Degree (EQF6); A2.4. academic levels of gap in Master’s degree (EQF7); A2.5. academic levels of gap in PhD/Doctorate (EQF8); A3. KNOWLEDGE gap in terms of HARD SKILLS; A4. KNOWLEDGE gap in terms of TRANSVERSAL SKILLS; A5. KNOWLEDGE gap in terms of DIGITAL SKILLS; A6. KNOWLEDGE gap in terms of GREEN SKILLS | | | | | | | | | | | | | | | | | | | | | | | | | | | | | | | |
| --- | --- | --- | --- | --- | --- | --- | --- | --- | --- | --- | --- | --- | --- | --- | --- | --- | --- | --- | --- | --- | --- | --- | --- | --- | --- | --- | --- | --- | --- | --- | --- |
| **Geographical area** | | | | | **Profession** | | | **A1** | | | **A2.1** | | **A2.2** | | **A2.3** | | **A2.4** | | **A2.5** | | **A3** | | **A4** | | **A5** | | **A6** | | |
|  | | | | |  | | | | **MEAN**  **(SD)** | | **MEAN**  **(SD)** | | **MEAN**  **(SD)** | | **MEAN**  **(SD)** | | **MEAN**  **(SD)** | | **MEAN**  **(SD)** | | **MEAN**  **(SD)** | | **MEAN**  **(SD)** | | **MEAN**  **(SD)** | | **MEAN**  **(SD)** | | |
|  | | |  | |  | |  | | **5.01** |  | **5.77** |  | **5.35** |  | **4.74** |  | **4.93** |  | **4.83** |  | **4.44** |  | **4.76** |  | **5.04** |  | **6.16** |  | |
|  | | |  | |  | |  | | **(2.23)** |  | **(2.88)** |  | **(2.58)** |  | **(2.56)** |  | **(2.76)** |  | **(3.04)** |  | **(2.22)** |  | **(2.17)** |  | **(2.10)** |  | **(2.30)** |  | |
| **Eastern Europe** | | |  | |  | |  | | **5.33** |  | **4.17** |  | **4.50** |  | **4.83** |  | **6.17** |  | **6.83** |  | **3.67** |  | **4.83** |  | **5.33** |  | **6.33** |  | |
|  | | |  | |  | |  | | **(2.25)** |  | **(2.99)** |  | **(3.21)** |  | **(2.79)** |  | **(2.14)** |  | **(2.48)** |  | **(3.08)** |  | **(2.14)** |  | **(3.27)** |  | **(3.08)** |  | |
|  | | |  | | Medical doctors | |  | | 4.50 |  | 4.00 |  | 4.00 |  | 4.50 |  | 5.00 |  | 6.00 |  | 1.00 |  | 4.50 |  | 3.50 |  | 5.00 |  | |
|  | | |  | |  | |  | | (3.54) |  | (4.24) |  | (4.24) |  | (3.54) |  | (2.83) |  | (2.83) |  | (0.00) |  | (2.12) |  | (3.54) |  | (5.66) |  | |
|  | | |  | | Nurses | |  | | - |  | - |  | - |  | - |  | - |  | - |  | - |  | - |  | - |  | - |  | |
|  | | |  | |  | |  | | - |  | - |  | - |  | - |  | - |  | - |  | - |  | - |  | - |  | - |  | |
|  | | |  | | Allied health professionals | |  | | 6.50 |  | 4.50 |  | 4.50 |  | 5.00 |  | 7.50 |  | 7.50 |  | 5.00 |  | 4.50 |  | 6.00 |  | 6.50 |  | |
|  | | |  | |  | |  | | (0.71) |  | (4.95) |  | (4.95) |  | (4.24) |  | (0.71) |  | (3.54) |  | (4.24) |  | (3.54) |  | (4.24) |  | (2.12) |  | |
|  | | |  | | Other | |  | | 7.00 |  | 5.00 |  | 7.00 |  | 7.00 |  | 8.00 |  | 9.00 |  | 7.00 |  | 7.00 |  | 9.00 |  | 9.00 |  | |
|  | | |  | |  | |  | | - |  | - |  | - |  | - |  | - |  | - |  | - |  | - |  | - |  | - |  | |
|  | | |  | | Academic | |  | | 3.00 |  | 3.00 |  | 3.00 |  | 3.00 |  | 4.00 |  | 5.00 |  | 3.00 |  | 4.00 |  | 4.00 |  | 6.00 |  | |
|  | | |  | |  | |  | | - |  | - |  | - |  | - |  | - |  | - |  | - |  | - |  | - |  | - |  | |
| **Northern Europe** | | |  | |  | |  | | **4.44** |  | **5.61** |  | **4.97** |  | **4.29** |  | **4.69** |  | **4.68** |  | **4.51** |  | **4.22** |  | **4.51** |  | **5.59** |  | |
|  | | |  | |  | |  | | **(2.17)** |  | **(3.11)** |  | **(2.66)** |  | **(2.62)** |  | **(2.91)** |  | **(2.65)** |  | **(2.29)** |  | **(2.23)** |  | **(2.30)** |  | **(2.19)** |  | |
|  | | |  | | Medical doctors | |  | | 3.80 |  | 8.00 |  | 7.60 |  | 5.40 |  | 3.00 |  | 3.00 |  | 3.60 |  | 3.40 |  | 3.20 |  | 5.20 |  | |
|  | | |  | |  | |  | | (2.68) |  | (2.35) |  | (1.52) |  | (2.07) |  | (1.58) |  | (2.00) |  | (2.07) |  | (1.67) |  | (1.10) |  | (3.19) |  | |
|  | | |  | | Nurses | |  | | 4.71 |  | 5.33 |  | 5.50 |  | 5.17 |  | 6.17 |  | 5.50 |  | 5.00 |  | 4.57 |  | 5.88 |  | 5.86 |  | |
|  | | |  | |  | |  | | (2.36) |  | (2.73) |  | (2.95) |  | (2.93) |  | (2.93) |  | (2.43) |  | (2.33) |  | (2.07) |  | (2.59) |  | (2.48) |  | |
|  | | |  | | Allied health professionals | |  | | 4.75 |  | 4.89 |  | 4.32 |  | 4.05 |  | 5.00 |  | 5.11 |  | 4.70 |  | 4.30 |  | 4.50 |  | 5.78 |  | |
|  | | |  | |  | |  | | (2.20) |  | (3.31) |  | (2.60) |  | (2.82) |  | (3.15) |  | (2.77) |  | (2.49) |  | (2.49) |  | (2.37) |  | (1.90) |  | |
|  | | |  | | Other | |  | | 3.00 |  | 8.00 |  | 5.00 |  | 2.50 |  | 2.50 |  | 2.50 |  | 3.00 |  | 4.00 |  | 3.50 |  | 5.50 |  | |
|  | | |  | |  | |  | | (0.00) |  | - |  | - |  | (0.71) |  | (0.71) |  | (2.12) |  | (0.00) |  | (1.41) |  | (0.71) |  | (2.12) |  | |
|  | | |  | | Academic | |  | | 3.50 |  | 6.00 |  | 3.00 |  | 3.00 |  | 3.50 |  | 4.50 |  | 4.50 |  | 4.50 |  | 3.50 |  | 4.00 |  | |
|  | | |  | |  | |  | | (0.71) |  | (2.83) |  | (0.00) |  | (0.00) |  | (2.12) |  | (3.54) |  | (2.12) |  | (3.54) |  | (2.12) |  | (2.83) |  | |
| **Southern Europe** | | |  | |  | |  | | **5.06** |  | **5.90** |  | **5.52** |  | **4.70** |  | **4.84** |  | **4.70** |  | **4.45** |  | **4.96** |  | **4.97** |  | **6.27** |  | |
|  | | |  | |  | |  | | **(2.25)** |  | **(2.79)** |  | **(2.47)** |  | **(2.53)** |  | **(2.69)** |  | **(3.04)** |  | **(2.16)** |  | **(2.09)** |  | **(1.92)** |  | **(2.29)** |  | |
|  | | |  | | Medical doctors | |  | | 3.70 |  | 4.91 |  | 5.05 |  | 4.41 |  | 3.91 |  | 4.00 |  | 3.86 |  | 4.14 |  | 4.39 |  | 5.59 |  | |
|  | | |  | |  | |  | | (1.99) |  | (3.13) |  | (2.82) |  | (2.61) |  | (2.54) |  | (2.83) |  | (1.86) |  | (1.96) |  | (1.78) |  | (2.61) |  | |
|  | | |  | | Nurses | |  | | 5.00 |  | 6.19 |  | 5.33 |  | 4.20 |  | 5.18 |  | 5.07 |  | 3.83 |  | 4.72 |  | 5.50 |  | 6.59 |  | |
|  | | |  | |  | |  | | (2.11) |  | (2.43) |  | (2.13) |  | (2.43) |  | (2.72) |  | (3.36) |  | (1.76) |  | (2.32) |  | (1.76) |  | (2.24) |  | |
|  | | |  | | Allied health professionals | |  | | 5.38 |  | 6.00 |  | 5.69 |  | 4.79 |  | 4.93 |  | 4.74 |  | 4.60 |  | 5.12 |  | 4.90 |  | 6.40 |  | |
|  | | |  | |  | |  | | (2.22) |  | (2.78) |  | (2.50) |  | (2.53) |  | (2.74) |  | (3.09) |  | (2.27) |  | (2.07) |  | (1.97) |  | (2.27) |  | |
|  | | |  | | Other | |  | | 4.78 |  | 6.57 |  | 5.57 |  | 4.44 |  | 5.38 |  | 5.50 |  | 5.00 |  | 4.89 |  | 5.22 |  | 6.00 |  | |
|  | | |  | |  | |  | | (1.99) |  | (2.64) |  | (2.23) |  | (2.46) |  | (2.33) |  | (2.73) |  | (1.87) |  | (1.62) |  | (1.79) |  | (2.18) |  | |
|  | | |  | | Academic | |  | | 6.50 |  | 6.83 |  | 5.67 |  | 6.17 |  | 5.50 |  | 4.67 |  | 5.50 |  | 6.50 |  | 6.17 |  | 6.50 |  | |
|  | | |  | |  | |  | | (2.66) |  | (2.48) |  | (2.25) |  | (2.79) |  | (2.88) |  | (3.39) |  | (2.88) |  | (1.97) |  | (1.83) |  | (1.64) |  | |
| **Western Europe** | | |  | |  | |  | | **5.37** |  | **6.05** |  | **5.67** |  | **5.56** |  | **5.35** |  | **4.91** |  | **4.31** |  | **4.30** |  | **5.93** |  | **6.56** |  | |
|  | | |  | |  | |  | | **(2.00)** |  | **(3.09)** |  | **(2.69)** |  | **(2.40)** |  | **(3.13)** |  | **(3.60)** |  | **(2.19)** |  | **(2.03)** |  | **(2.11)** |  | **(1.78)** |  | |
|  | | |  | | Medical doctors | |  | | 5.50 |  | 3.50 |  | 4.50 |  | 6.50 |  | 1.00 |  | 1.00 |  | 5.50 |  | 6.00 |  | 6.50 |  | 6.00 |  | |
|  | | |  | |  | |  | | (2.12) |  | (3.54) |  | (3.54) |  | (0.71) |  | - |  | - |  | (2.12) |  | (0.00) |  | (0.71) |  | (5.66) |  | |
|  | | |  | | Nurses | |  | | 6.00 |  | 6.00 |  | 5.50 |  | 5.33 |  | 5.00 |  | 4.67 |  | 5.00 |  | 5.67 |  | 7.33 |  | 7.00 |  | |
|  | | |  | |  | |  | | (0.00) |  | (0.00) |  | (0.71) |  | (1.53) |  | (2.00) |  | (1.53) |  | (1.00) |  | (2.31) |  | (1.53) |  | (0.00) |  | |
|  | | |  | | Allied health professionals | |  | | 4.88 |  | 6.50 |  | 5.58 |  | 5.00 |  | 5.29 |  | 4.71 |  | 4.06 |  | 3.41 |  | 5.24 |  | 6.88 |  | |
|  | | |  | |  | |  | | (2.20) |  | (3.68) |  | (2.84) |  | (2.62) |  | (3.34) |  | (3.93) |  | (2.41) |  | (1.73) |  | (2.22) |  | (1.15) |  | |
|  | | |  | | Other | |  | | 5.50 |  | 4.00 |  | 6.00 |  | 9.00 |  | 9.00 |  | 9.00 |  | 2.50 |  | 5.00 |  | 7.50 |  | 5.50 |  | |
|  | | |  | |  | |  | | (2.12) |  | (0.00) |  | (5.66) |  | (1.41) |  | (1.41) |  | (1.41) |  | (0.71) |  | (1.41) |  | (0.71) |  | (0.71) |  | |
|  | | |  | | Academic | |  | | 7.33 |  | 7.33 |  | 6.67 |  | 5.67 |  | 5.00 |  | 4.67 |  | 6.00 |  | 6.33 |  | 7.00 |  | 5.67 |  | |
|  | | |  | |  | |  | | (0.58) |  | (0.58) |  | (1.53) |  | (1.53) |  | (2.65) |  | (3.79) |  | (1.41) |  | (2.08) |  | (2.00) |  | (2.89) |  | |
| **Other** | | |  | |  | |  | | **5.29** |  | **5.15** |  | **4.83** |  | **4.86** |  | **5.15** |  | **5.23** |  | **4.71** |  | **5.07** |  | **5.07** |  | **5.93** |  | |
|  | | |  | |  | |  | | **(2.27)** |  | **(2.54)** |  | **(2.55)** |  | **(2.38)** |  | **(2.30)** |  | **(2.74)** |  | **(2.02)** |  | **(2.53)** |  | **(2.09)** |  | **(2.64)** |  | |
|  | | |  | | Medical doctors | |  | | 7.50 |  | 6.50 |  | 7.00 |  | 6.00 |  | 7.50 |  | 7.50 |  | 6.00 |  | 9.00 |  | 7.00 |  | 9.00 |  | |
|  | | |  | |  | |  | | (3.549 |  | (2.12) |  | (2.83) |  | (4.24) |  | (3.54) |  | (3.54) |  | (4.24) |  | (1.41) |  | (2.83) |  | (1.41) |  | |
|  | | |  | | Nurses | |  | | 3.00 |  | 6.50 |  | 4.50 |  | 2.50 |  | 2.50 |  | 2.00 |  | 3.00 |  | 2.50 |  | 2.00 |  | 3.50 |  | |
|  | | |  | |  | |  | | (0.00) |  | (2.12) |  | (2.12) |  | (0.71) |  | (0.71) |  | (1.41) |  | (0.00) |  | (0.71) |  | (0.00) |  | (2.12) |  | |
|  | | |  | | Allied health professionals | |  | | 4.20 |  | 3.75 |  | 3.25 |  | 4.40 |  | 5.25 |  | 6.25 |  | 4.20 |  | 4.00 |  | 4.40 |  | 4.00 |  | |
|  | | |  | |  | |  | | (1.30) |  | (2.75) |  | (1.89) |  | (2.07) |  | (2.06) |  | (2.36) |  | (1.79) |  | (2.12) |  | (0.89) |  | (1.22) |  | |
|  | | |  | | Other | |  | | 8.00 |  | 6.50 |  | 8.00 |  | 7.50 |  | 6.50 |  | 6.50 |  | 5.50 |  | 6.50 |  | 7.00 |  | 7.00 |  | |
|  | | |  | |  | |  | | (1.41) |  | (0.71) |  | - |  | (0.71) |  | (2.12) |  | (2.12) |  | (0.71) |  | (0.71) |  | (0.00) |  | (0.00) |  | |
|  | | |  | | Academic | |  | | 5.33 |  | 4.33 |  | 4.67 |  | 4.67 |  | 4.33 |  | 3.67 |  | 5.33 |  | 5.00 |  | 5.67 |  | 8.00 |  | |
|  | | |  | |  | |  | | (1.53) |  | (3.51) |  | (3.06) |  | (2.08) |  | (1.15) |  | (2.08) |  | (2.08) |  | (2.00) |  | (2.08) |  | (2.65) |  | |
| **North America** | | |  | |  | |  | | **4.50** |  | **6.00** |  | **4.33** |  | **4.00** |  | **4.75** |  | **5.00** |  | **4.25** |  | **4.75** |  | **6.00** |  | **5.50** |  | |
|  | | |  | |  | |  | | **(3.87)** |  | **(4.58)** |  | **(4.93)** |  | **(5.20)** |  | **(4.50)** |  | **(4.69)** |  | **(4.03)** |  | **(3.86)** |  | **(3.74)** |  | **(4.20)** |  | |
|  | | |  | | Medical doctors | |  | | 1.00 |  | 1.00 |  | 1.00 |  | 1.00 |  | 1.00 |  | 1.00 |  | 1.00 |  | 1.00 |  | 1.00 |  | 1.00 |  | |
|  | | |  | |  | |  | | - |  | - |  | - |  | - |  | - |  | - |  | - |  | - |  | - |  | - |  | |
|  | | |  | | Nurses | |  | | 3.00 |  | 7.00 |  | 2.00 |  | 1.00 |  | 1.00 |  | 1.00 |  | 2.00 |  | 5.00 |  | 6.00 |  | 3.00 |  | |
|  | | |  | |  | |  | | - |  | - |  | - |  | - |  | - |  | - |  | - |  | - |  | - |  | - |  | |
|  | | |  | | Allied health professionals | |  | | 4.00 |  | - |  | - |  | - |  | 7.00 |  | 8.00 |  | 4.00 |  | 3.00 |  | 7.00 |  | 8.00 |  | |
|  | | |  | |  | |  | | - |  | - |  | - |  | - |  | - |  | - |  | - |  | - |  | - |  | - |  | |
|  | | |  | | Other | |  | | - |  | - |  | - |  | - |  | - |  | - |  | - |  | - |  | - |  | - |  | |
|  | | |  | |  | |  | | - |  | - |  | - |  | - |  | - |  | - |  | - |  | - |  | - |  | - |  | |
|  | | |  | | Academic | |  | | 10.0 |  | 10.0 |  | 10.0 |  | 10.0 |  | 10.0 |  | 10.0 |  | 10.0 |  | 10.0 |  | 10.0 |  | 10.0 |  | |
|  | | |  | |  | |  | | - |  | - |  | - |  | - |  | - |  | - |  | - |  | - |  | - |  | - |  | |
|  |  |  | |  | |  | | | |  |  |  |  |  |  |  |  |  |  |  |  |  |  |  |  |  |  |  |  | |  |
|  | | | | | | | | | | | | | | | | | | | | | | | | | | | | | | | |
