# Supplementary material for: Identifying and assessing expertise gaps in healthcare education across Europe: a cross-sectional study
Source: Research Square preprint supplement (doi:10.21203/rs.3.rs-7934532/v1), 2025-12-22
Supplement: Supplementary file 5 [file b9d40dc7cbdfd9604f39128a.docx]

**Table 4. Expertise gaps in terms of Knowledge, Practice, Research and Teaching Methods across the Professional Groups and European Regions**

| **Gaps of expertise in terms of KNOWLEDGE** | | | | | | | | | | | | | | | | | | | | | | | | | | | | | | | |
| --- | --- | --- | --- | --- | --- | --- | --- | --- | --- | --- | --- | --- | --- | --- | --- | --- | --- | --- | --- | --- | --- | --- | --- | --- | --- | --- | --- | --- | --- | --- | --- |
| **Geographical area** | | | | |  | | | **A1** | | | **A2.1** | | **A2.2** | | **A2.3** | | **A2.4** | | **A2.5** | | **A3** | | **A4** | | **A5** | | **A6** | | |
|  | | | | |  | | | | **MEAN**  **(SD)** | | **MEAN**  **(SD)** | | **MEAN**  **(SD)** | | **MEAN**  **(SD)** | | **MEAN**  **(SD)** | | **MEAN**  **(SD)** | | **MEAN**  **(SD)** | | **MEAN**  **(SD)** | | **MEAN**  **(SD)** | | **MEAN**  **(SD)** | | |
|  | | |  | |  | |  | | **5.01** |  | **5.77** |  | **5.35** |  | **4.74** |  | **4.93** |  | **4.83** |  | **4.44** |  | **4.76** |  | **5.04** |  | **6.16** |  | |
|  | | |  | |  | |  | | **(2.23)** |  | **(2.88)** |  | **(2.58)** |  | **(2.56)** |  | **(2.76)** |  | **(3.04)** |  | **(2.22)** |  | **(2.17)** |  | **(2.10)** |  | **(2.30)** |  | |
| **Eastern Europe** | | |  | |  | |  | | 5.33 |  | 4.17 |  | 4.50 |  | 4.83 |  | 6.17 |  | 6.83 |  | 3.67 |  | 4.83 |  | 5.33 |  | 6.33 |  | |
|  | | |  | |  | |  | | (2.25) |  | (2.99) |  | (3.21) |  | (2.79) |  | (2.14) |  | (2.48) |  | (3.08) |  | (2.14) |  | (3.27) |  | (3.08) |  | |
| **Northern Europe** | | |  | |  | |  | | 4.44 |  | 5.61 |  | 4.97 |  | 4.29 |  | 4.69 |  | 4.68 |  | 4.51 |  | 4.22 |  | 4.51 |  | 5.59 |  | |
|  | | |  | |  | |  | | (2.17) |  | (3.11) |  | (2.66) |  | (2.62) |  | (2.91) |  | (2.65) |  | (2.29) |  | (2.23) |  | (2.30) |  | (2.19) |  | |
| **Southern Europe** | | |  | |  | |  | | 5.06 |  | 5.90 |  | 5.52 |  | 4.70 |  | 4.84 |  | 4.70 |  | 4.45 |  | 4.96 |  | 4.97 |  | 6.27 |  | |
|  | | |  | |  | |  | | (2.25) |  | (2.79) |  | (2.47) |  | (2.53) |  | (2.69) |  | (3.04) |  | (2.16) |  | (2.09) |  | (1.92) |  | (2.29) |  | |
| **Western Europe** | | |  | |  | |  | | 5.37 |  | 6.05 |  | 5.67 |  | 5.56 |  | 5.35 |  | 4.91 |  | 4.31 |  | 4.30 |  | 5.93 |  | 6.56 |  | |
|  | | |  | |  | |  | | (2.00) |  | (3.09) |  | (2.69) |  | (2.40) |  | (3.13) |  | (3.60) |  | (2.19) |  | (2.03) |  | (2.11) |  | (1.78) |  | |
| **Other** | | |  | |  | |  | | 5.29 |  | 5.15 |  | 4.83 |  | 4.86 |  | 5.15 |  | 5.23 |  | 4.71 |  | 5.07 |  | 5.07 |  | 5.93 |  | |
|  | | |  | |  | |  | | (2.27) |  | (2.54) |  | (2.55) |  | (2.38) |  | (2.30) |  | (2.74) |  | (2.02) |  | (2.53) |  | (2.09) |  | (2.64) |  | |
| **North America** | | |  | |  | |  | | 4.50 |  | 6.00 |  | 4.33 |  | 4.00 |  | 4.75 |  | 5.00 |  | 4.25 |  | 4.75 |  | 6.00 |  | 5.50 |  | |
|  | | |  | |  | |  | | (3.87) |  | (4.58) |  | (4.93) |  | (5.20) |  | (4.50) |  | (4.69) |  | (4.03) |  | (3.86) |  | (3.74) |  | (4.20) |  | |
|  |  |  | |  | |  | | | |  |  |  |  |  |  |  |  |  |  |  |  |  |  |  |  |  |  |  |  | |  |
| **Legend:** A2.1. academic levels of gap in Secondary Level (EQF4); A2.2. academic levels of gap in Post Secondary Level (EQF5); A2.3. academic levels of gap in Bachelor’s Degree (EQF6); A2.4. academic levels of gap in Master’s degree (EQF7); A2.5. academic levels of gap in PhD/Doctorate (EQF8); A3. KNOWLEDGE gap in terms of HARD SKILLS; A4. KNOWLEDGE gap in terms of TRANSVERSAL SKILLS; A5. KNOWLEDGE gap in terms of DIGITAL SKILLS; A6. KNOWLEDGE gap in terms of GREEN SKILLS | | | | | | | | | | | | | | | | | | | | | | | | | | | | | | | |
| **Gaps of expertise in terms of PRACTICE** | | | | | | | | | | | | | | | | | | | | | | | | | | | | | | | |
| **Geographical area** | | | | |  | | | **B1** | | | **B2.1** | | **B2.2** | | **B2.3** | | **B2.4** | | **B2.5** | | **B3** | | **B4** | | **B5** | | **B6** | | |
|  | | | | |  | | | | **MEAN**  **(SD)** | | **MEAN**  **(SD)** | | **MEAN**  **(SD)** | | **MEAN**  **(SD)** | | **MEAN**  **(SD)** | | **MEAN**  **(SD)** | | **MEAN**  **(SD)** | | **MEAN**  **(SD)** | | **MEAN**  **(SD)** | | **MEAN**  **(SD)** | | |
|  | | |  | |  | |  | | **4.61** |  | **6.19** |  | **5.68** |  | **4.68** |  | **4.75** |  | **4.79** |  | **4.43** |  | **4.65** |  | **5.03** |  | **5.96** |  | |
|  | | |  | |  | |  | | **(2.21)** |  | **(3.03)** |  | **(2.76)** |  | **(2.47)** |  | **(2.66)** |  | **(2.97)** |  | **(2.24)** |  | **(2.15)** |  | **(2.26)** |  | **(2.29)** |  | |
| **Eastern Europe** | | |  | |  | |  | | 5.33 |  | 4.00 |  | 4.33 |  | 5.00 |  | 6.33 |  | 6.67 |  | 3.67 |  | 4.50 |  | 4.33 |  | 6.00 |  | |
|  | | |  | |  | |  | | (2.94) |  | (2.53) |  | (2.42) |  | (2.53) |  | (3.01) |  | (2.94) |  | (3.08) |  | (2.88) |  | (3.20) |  | (3.03) |  | |
| **Northern Europe** | | |  | |  | |  | | 4.16 |  | 5.69 |  | 5.03 |  | 4.06 |  | 4.40 |  | 4.65 |  | 4.17 |  | 4.11 |  | 4.32 |  | 5.66 |  | |
|  | | |  | |  | |  | | (2.14) |  | (3.27) |  | (2.76) |  | (2.17) |  | (2.38) |  | (2.79) |  | (2.31) |  | (2.14) |  | (2.39) |  | (2.15) |  | |
| **Southern Europe** | | |  | |  | |  | | 4.69 |  | 6.44 |  | 5.89 |  | 4.69 |  | 4.63 |  | 4.59 |  | 4.43 |  | 4.80 |  | 5.03 |  | 6.01 |  | |
|  | | |  | |  | |  | | (2.14) |  | (2.95) |  | (2.75) |  | (2.48) |  | (2.62) |  | (2.92) |  | (2.10) |  | (2.02) |  | (2.16) |  | (2.27) |  | |
| **Western Europe** | | |  | |  | |  | | 4.19 |  | 6.50 |  | 6.14 |  | 4.75 |  | 4.83 |  | 4.74 |  | 4.59 |  | 4.30 |  | 5.78 |  | 6.16 |  | |
|  | | |  | |  | |  | | (2.25) |  | (3.15) |  | (2.76) |  | (2.67) |  | (3.16) |  | (3.44) |  | (2.44) |  | (2.27) |  | (2.06) |  | (2.12) |  | |
| **Other** | | |  | |  | |  | | 5.38 |  | 5.17 |  | 5.08 |  | 5.69 |  | 5.73 |  | 6.17 |  | 5.23 |  | 5.25 |  | 5.38 |  | 5.92 |  | |
|  | | |  | |  | |  | | (2.29) |  | (2.86) |  | (2.61) |  | (2.36) |  | (2.41) |  | (2.48) |  | (2.39) |  | (2.38) |  | (2.06) |  | (2.43) |  | |
| **North America** | | |  | |  | |  | | 5.67 |  | 9.00 |  | 6.50 |  | 6.50 |  | 6.00 |  | 5.33 |  | 4.25 |  | 5.50 |  | 6.25 |  | 5.75 |  | |
|  | | |  | |  | |  | | (4.04) |  | (1.41) |  | (4.95) |  | (4.95) |  | (3.61) |  | (4.51) |  | (4.03) |  | (3.87) |  | (3.86) |  | (4.43) |  | |
|  |  |  | |  | |  | | | |  |  |  |  |  |  |  |  |  |  |  |  |  |  |  |  |  |  |  |  | |  |
| **Legend:** B2.1. academic levels of gap in Secondary Level (EQF4); B2.2. academic levels of gap in Post Secondary Level (EQF5); B2.3. academic levels of gap in Bachelor’s Degree (EQF6); B2.4. academic levels of gap in Master’s Degree (EQF7); B2.5. academic levels of gap in PhD/Doctorate (EQF8); B3. RESEARCH gap in terms of HARD SKILLS; B4. RESEARCH gap in terms of TRANSVERSAL SKILLS; B5. RESEARCH gap in terms of DIGITAL SKILLS; B6. RESEARCH gap in terms of GREEN SKILLS | | | | | | | | | | | | | | | | | | | | | | | | | | | | | | | |
| **Gaps of expertise in terms of RESEARCH** | | | | | | | | | | | | | | | | | | | | | | | | | | | | | | | |
| **Geographical area** | | | | |  | | | **C1** | | | **C2.1** | | **C2.2** | | **C2.3** | | **C2.4** | | **C2.5** | | **C3** | | **C4** | | **C5** | | **C6** | | |
|  | | | | |  | | | | **MEAN**  **(SD)** | | **MEAN**  **(SD)** | | **MEAN**  **(SD)** | | **MEAN**  **(SD)** | | **MEAN**  **(SD)** | | **MEAN**  **(SD)** | | **MEAN**  **(SD)** | | **MEAN**  **(SD)** | | **MEAN**  **(SD)** | | **MEAN**  **(SD)** | | |
|  | | |  | |  | |  | | **6.24** |  | **6.92** |  | **6.56** |  | **5.42** |  | **4.65** |  | **4.14** |  | **5.65** |  | **5.50** |  | **5.59** |  | **6.27** |  | |
|  | | |  | |  | |  | | **(2.44)** |  | **(2.92)** |  | **(2.69)** |  | **(2.47)** |  | **(2.54)** |  | **(2.92)** |  | **(2.36)** |  | **(2.29)** |  | **(2.37)** |  | **(2.41)** |  | |
| **Eastern Europe** | | |  | |  | |  | | 7.60 |  | 4.80 |  | 5.20 |  | 5.80 |  | 5.00 |  | 5.40 |  | 5.80 |  | 6.80 |  | 5.80 |  | 7.40 |  | |
|  | | |  | |  | |  | | (1.14) |  | (3.49) |  | (3.27) |  | (3.42) |  | (3.08) |  | (3.29) |  | (2.05) |  | (2.17) |  | (3.11) |  | (2.30) |  | |
| **Northern Europe** | | |  | |  | |  | | 5.22 |  | 5.87 |  | 5.47 |  | 4.20 |  | 3.69 |  | 3.85 |  | 4.61 |  | 4.68 |  | 4.80 |  | 5.43 |  | |
|  | | |  | |  | |  | | (2.47) |  | (3.34) |  | (2.70) |  | (2.15) |  | (2.15) |  | (2.64) |  | (2.08) |  | (2.03) |  | (2.26) |  | (2.18) |  | |
| **Southern Europe** | | |  | |  | |  | | 6.43 |  | 7.30 |  | 6.77 |  | 5.63 |  | 4.81 |  | 4.12 |  | 5.75 |  | 5.66 |  | 5.64 |  | 6.39 |  | |
|  | | |  | |  | |  | | (2.29) |  | (2.67) |  | (2.60) |  | (2.40) |  | (2.51) |  | (2.92) |  | (2.24) |  | (2.21) |  | (2.31) |  | (2.39) |  | |
| **Western Europe** | | |  | |  | |  | | 6.69 |  | 7.67 |  | 7.79 |  | 5.96 |  | 4.65 |  | 3.82 |  | 6.50 |  | 5.46 |  | 6.42 |  | 6.58 |  | |
|  | | |  | |  | |  | | (2.81) |  | (2.93) |  | (2.35) |  | (2.71) |  | (2.82) |  | (3.25) |  | (2.75) |  | (2.45) |  | (2.39) |  | (2.38) |  | |
| **Other** | | |  | |  | |  | | 5.92 |  | 6.09 |  | 6.09 |  | 6.08 |  | 5.45 |  | 5.09 |  | 5.54 |  | 5.85 |  | 5.46 |  | 6.31 |  | |
|  | | |  | |  | |  | | (1.98) |  | (2.70) |  | (2.51) |  | (2.23) |  | (2.25) |  | (2.63) |  | (2.40) |  | (2.67) |  | (2.30) |  | (2.46) |  | |
| **North America** | | |  | |  | |  | | 5.00 |  | 5.33 |  | 5.33 |  | 2.00 |  | 5.50 |  | 5.00 |  | 5.50 |  | 4.50 |  | 5.75 |  | 4.67 |  | |
|  | | |  | |  | |  | | (4.69) |  | (4.51) |  | (4.51) |  | (1.41) |  | (4.20) |  | (4.24) |  | (4.20) |  | (4.04) |  | (4.03) |  | (4.73) |  | |
|  |  |  | |  | |  | | | |  |  |  |  |  |  |  |  |  |  |  |  |  |  |  |  |  |  |  |  | |  |
| **Legend:** C2.1. academic levels of gap in Secondary Level (EQF4); C2.2. academic levels of gap in Post Secondary Level (EQF5); C2.3. academic levels of gap in Bachelor’s Degree (EQF6); C2.4. academic levels of gap in Master’s Degree (EQF7); C2.5. academic levels of gap in PhD/Doctorate (EQF8); C3. RESEARCH gap in terms of HARD SKILLS; C4. RESEARCH gap in terms of TRANSVERSAL SKILLS; C5. RESEARCH gap in terms of DIGITAL SKILLS; C6. RESEARCH gap in terms of GREEN SKILLS | | | | | | | | | | | | | | | | | | | | | | | | | | | | | | | |
| | **Gap of expertise in terms of TEACHING METHODS** | | | | | | | | | | | | | | | | | | | | | | | | | | | | | | | | | --- | --- | --- | --- | --- | --- | --- | --- | --- | --- | --- | --- | --- | --- | --- | --- | --- | --- | --- | --- | --- | --- | --- | --- | --- | --- | --- | --- | --- | --- | --- | --- | | **Geographical area** | | | | |  | | | **D1** | | | **D2.1** | | **D2.2** | | **D2.3** | | **D2.4** | | **D2.5** | | **D3** | | **D4** | | **D5** | | **D6** | | | |  | | | | |  | | | | **MEAN**  **(SD)** | | **MEAN**  **(SD)** | | **MEAN**  **(SD)** | | **MEAN**  **(SD)** | | **MEAN**  **(SD)** | | **MEAN**  **(SD)** | | **MEAN**  **(SD)** | | **MEAN**  **(SD)** | | **MEAN**  **(SD)** | | **MEAN**  **(SD)** | | | |  | | |  | |  | |  | | **5.00** |  | **5.65** |  | **5.43** |  | **4.79** |  | **4.68** |  | **4.36** |  | **4.86** |  | **4.90** |  | **5.33** |  | **6.05** |  | | |  | | |  | |  | |  | | **(2.24)** |  | **(2.94)** |  | **(2.67)** |  | **(2.34)** |  | **(2.47)** |  | **(2.67)** |  | **(2.37)** |  | **(2.19)** |  | **(2.27)** |  | **(2.40)** |  | | | **Eastern Europe** | | |  | |  | |  | | 5.17 |  | 3.60 |  | 4.60 |  | 5.20 |  | 6.00 |  | 7.00 |  | 4.00 |  | 5.17 |  | 5.50 |  | 7.00 |  | | |  | | |  | |  | |  | | (2.14) |  | (2.07) |  | (2.30) |  | (2.39) |  | (1.87) |  | (2.92) |  | (2.76) |  | (2.32) |  | (2.81) |  | (2.53) |  | | | **Northern Europe** | | |  | |  | |  | | 4.37 |  | 4.15 |  | 4.30 |  | 4.03 |  | 3.87 |  | 4.17 |  | 4.21 |  | 4.29 |  | 4.44 |  | 5.71 |  | | |  | | |  | |  | |  | | (2.07) |  | (3.01) |  | (2.51) |  | (2.26) |  | (2.39) |  | (2.59) |  | (2.26) |  | (2.11) |  | (2.12) |  | (2.43) |  | | | **Southern Europe** | | |  | |  | |  | | 5.15 |  | 6.10 |  | 5.70 |  | 4.87 |  | 4.77 |  | 4.20 |  | 5.07 |  | 5.07 |  | 5.38 |  | 6.14 |  | | |  | | |  | |  | |  | | (2.17) |  | (2.78) |  | (2.58) |  | (2.27) |  | (2.48) |  | (2.60) |  | (2.21) |  | (2.06) |  | (2.18) |  | (2.34) |  | | | **Western Europe** | | |  | |  | |  | | 4.85 |  | 5.79 |  | 5.62 |  | 5.04 |  | 4.61 |  | 4.24 |  | 4.46 |  | 4.72 |  | 6.22 |  | 6.26 |  | | |  | | |  | |  | |  | | (2.57) |  | (3.43) |  | (3.01) |  | (2.37) |  | (2.48) |  | (2.84) |  | (2.92) |  | (2.61) |  | (2.28) |  | (2.24) |  | | | **Other** | | |  | |  | |  | | 5.23 |  | 5.50 |  | 5.42 |  | 5.08 |  | 5.25 |  | 5.50 |  | 5.31 |  | 4.92 |  | 4.85 |  | 5.54 |  | | |  | | |  | |  | |  | | (2.42) |  | (2.47) |  | (2.78) |  | (2.61) |  | (2.30) |  | (2.50) |  | (2.32) |  | (2.36) |  | (2.30) |  | (2.70) |  | | | **North America** | | |  | |  | |  | | 5.25 |  | 5.67 |  | 5.67 |  | 5.67 |  | 5.25 |  | 4.50 |  | 5.75 |  | 5.25 |  | 6.75 |  | 4.33 |  | | |  | | |  | |  | |  | | (3.77) |  | (4.51) |  | (4.51) |  | (4.51) |  | (3.77) |  | (3.87) |  | (4.03) |  | (4.03) |  | (3.95) |  | (4.93) |  | | |  |  |  | |  | |  | | | |  |  |  |  |  |  |  |  |  |  |  |  |  |  |  |  |  |  |  |  | |  | |  | | | | | | | | | | | | | | | | | | | | | | | | | | | | | | | |   **Legend:** D2.1. academic levels of gap in Secondary Level (EQF4); D2.2. academic levels of gap in Post Secondary Level (EQF5); D2.3. academic levels of gap in Bachelor’s Degree (EQF6); D2.4. academic levels of gap in Master’s Degree (EQF7); D2.5. academic levels of gap in PhD/Doctorate (EQF8); D3. TEACHING METHODS gap in terms of HARD SKILLS; D4. TEACHING METHODS gap in terms of TRANSVERSAL SKILLS; D5. TEACHING METHODS gap in terms of DIGITAL SKILLS; D6. TEACHING METHODS gap in terms of GREEN SKILLS | | | | | | | | | | | | | | | | | | | | | | | | | | | | | | | |
